# Supplementary material
Source: publisher figshare collection journal article supplement (https://acs.figshare.com/ndownloader/files/3718402)
Supplement: Supplementary file 1 [file 3718402]

# **Room Temperature Quantum Coherence and Rabi Oscillations in Vanadyl Phthalocyanine: Toward Multifunctional Molecular Spin Qubits**

Matteo Atzori,<sup>†</sup> Lorenzo Tesi,<sup>†</sup> Elena Morra,<sup>†</sup> Mario Chiesa,<sup>†</sup> Lorenzo Sorace,<sup>†</sup> and Roberta Sessoli<sup>\*,†</sup>

<sup>†</sup> Dipartimento di Chimica “Ugo Schiff” & INSTM RU, Università degli Studi di Firenze, Via della Lastruccia 3, I50019 Sesto Fiorentino (Firenze), Italy.

<sup>‡</sup> Dipartimento di Chimica & NIS Centre, Università di Torino, Via P. Giuria 7, I10125 Torino, Italy.

## **SUPPORTING INFORMATION**

## Crystal Structure

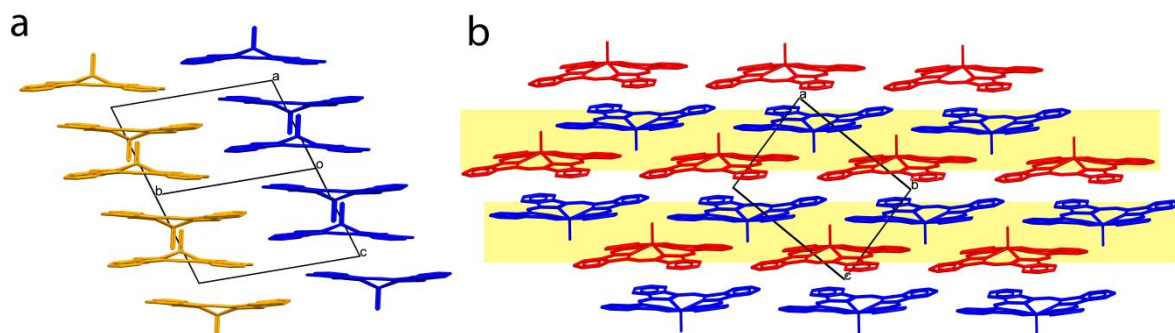

**Figure S1.** (a) View of the crystal structure of **1** where the stacked VOPc molecules are highlighted. (b) View of the molecular disposition of the VOPc molecules inside each layer parallel to the *ac* plane, and collinear orientation of the VO moieties.

## Powder X-ray Crystallography

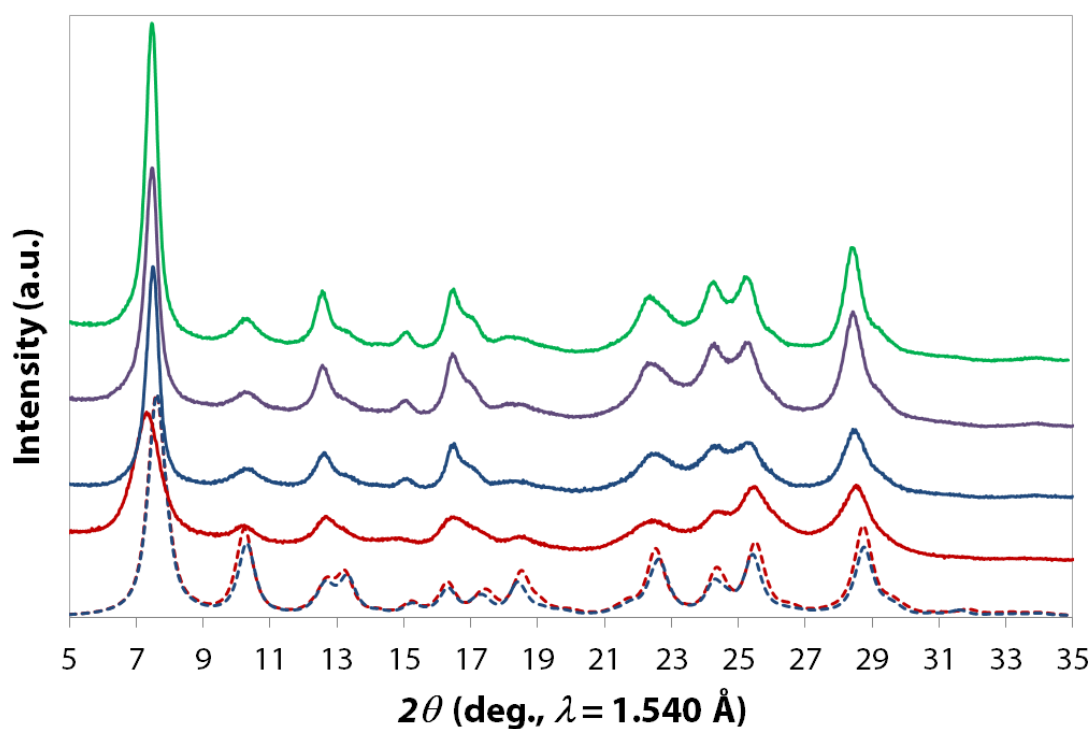

**Figure S2.** Comparison between experimental (solid lines) and simulated (dashed lines) PXRD patterns (5–35°,  $2\theta$ ) for TiOPc-II (blue line), VOPc-II (**1**) (red line), VOPc:TiOPc<sub>1:10</sub>-II (**2**) (violet line), and VOPc:TiOPc<sub>1:1000</sub>-II (**3**) (green line).

## AC Susceptometry

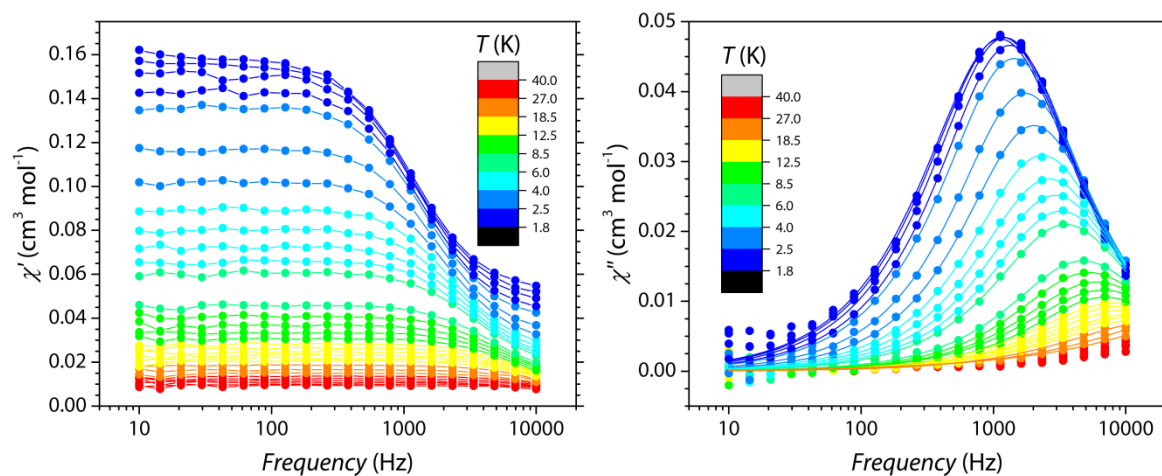

**Figure S3.** Frequency dependence of the real component  $\chi'$  (left) and the imaginary component  $\chi''$  (right) of the magnetic susceptibility of **1** as a function of the temperature (1.8–40 K range) under an applied static magnetic field of 0.2 T.

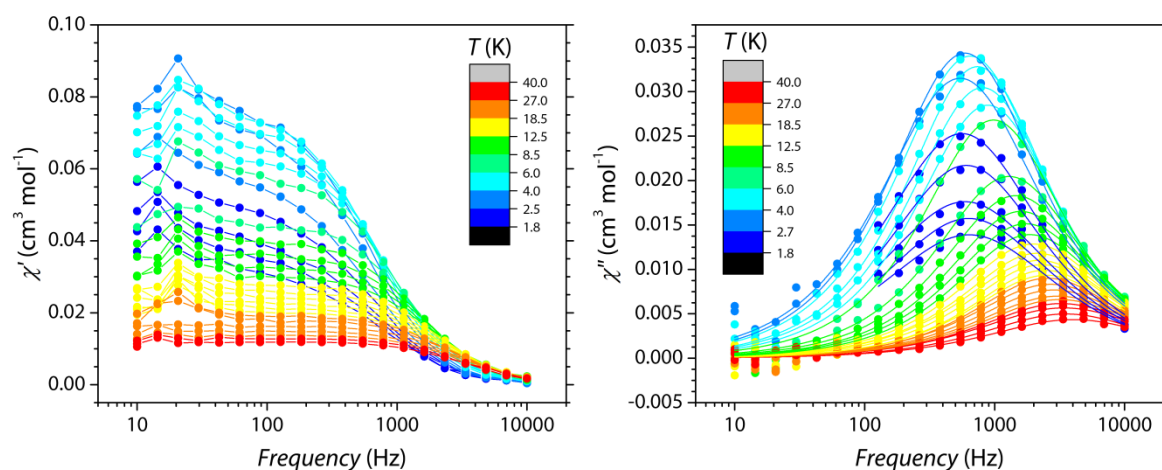

**Figure S4.** Frequency dependence of the real component  $\chi'$  (left) and the imaginary component  $\chi''$  (right) of the magnetic susceptibility of **1** as a function of the temperature (1.8–40 K range) under an applied static magnetic field of 1.0 T.

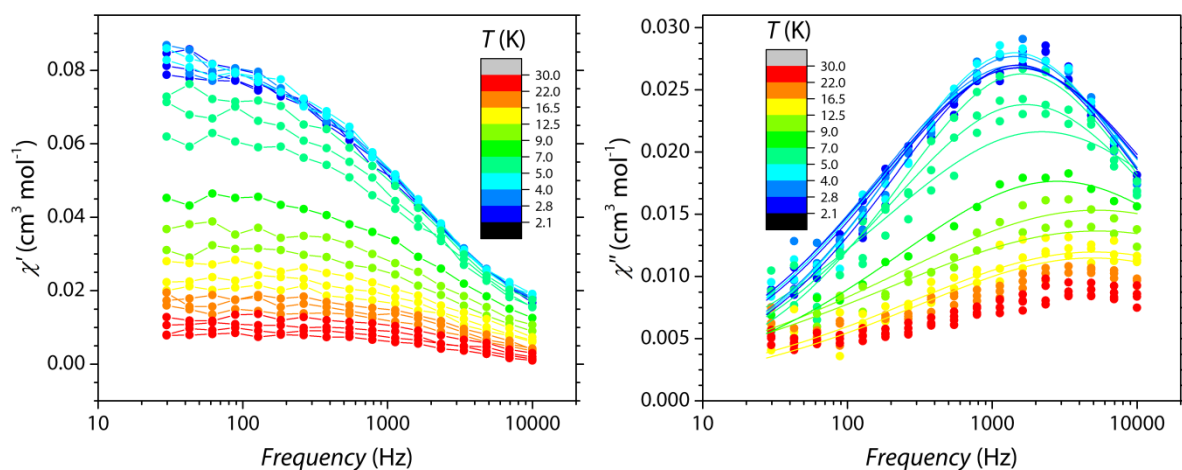

**Figure S5.** Frequency dependence of the real component  $\chi'$  (left) and the imaginary component  $\chi''$  (right) of the magnetic susceptibility of **2** as a function of the temperature (2.1–30 K range) under an applied static magnetic field of 0.2 T.

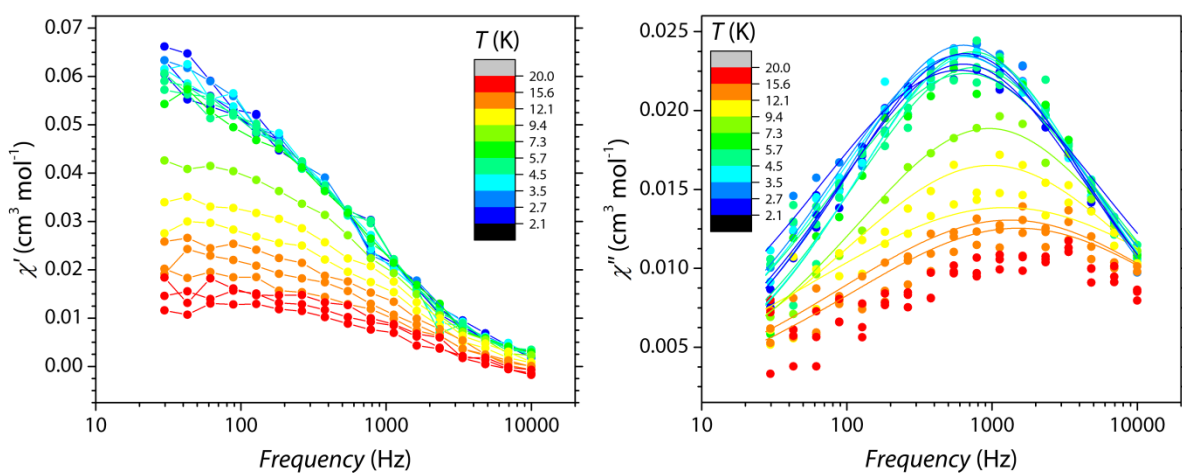

**Figure S6.** Frequency dependence of the real component  $\chi'$  (left) and the imaginary component  $\chi''$  (right) of the magnetic susceptibility of **2** as a function of the temperature (2.1–20 K range) under an applied static magnetic field of 1.0 T.

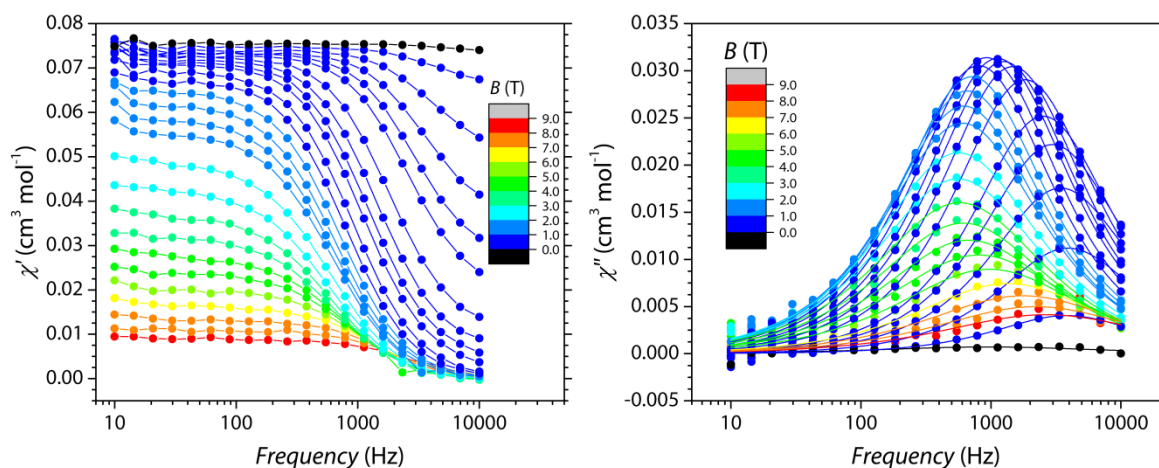

**Figure S7.** Frequency dependence of the real component  $\chi'$  (left) and the imaginary component  $\chi''$  (right) of the magnetic susceptibility of **1** as a function of the magnetic field (0.0–8.8 T range) at  $T = 5$  K.

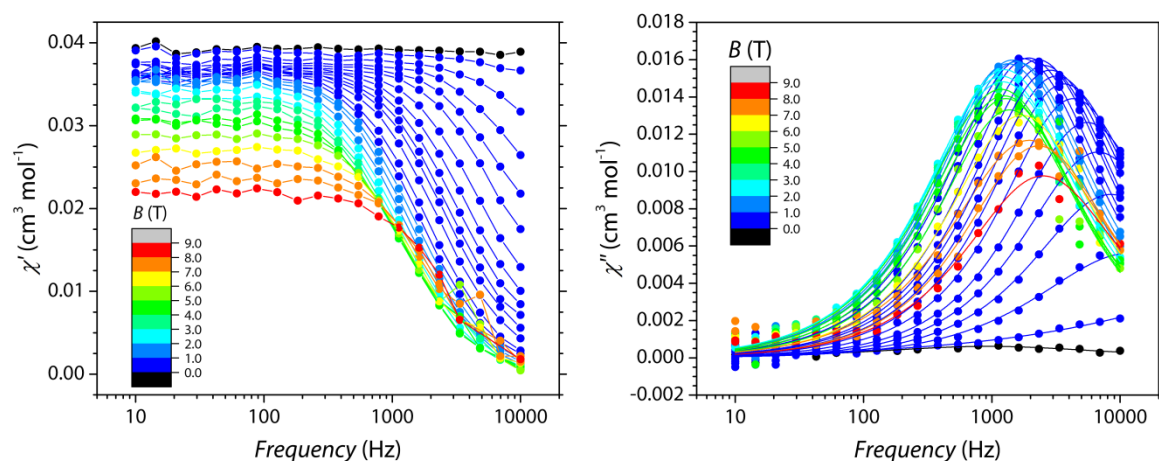

**Figure S8.** Frequency dependence of the real component  $\chi'$  (left) and the imaginary component  $\chi''$  (right) of the magnetic susceptibility of **1** as a function of the magnetic field (0.0–8.8 T range) at  $T = 10$  K.

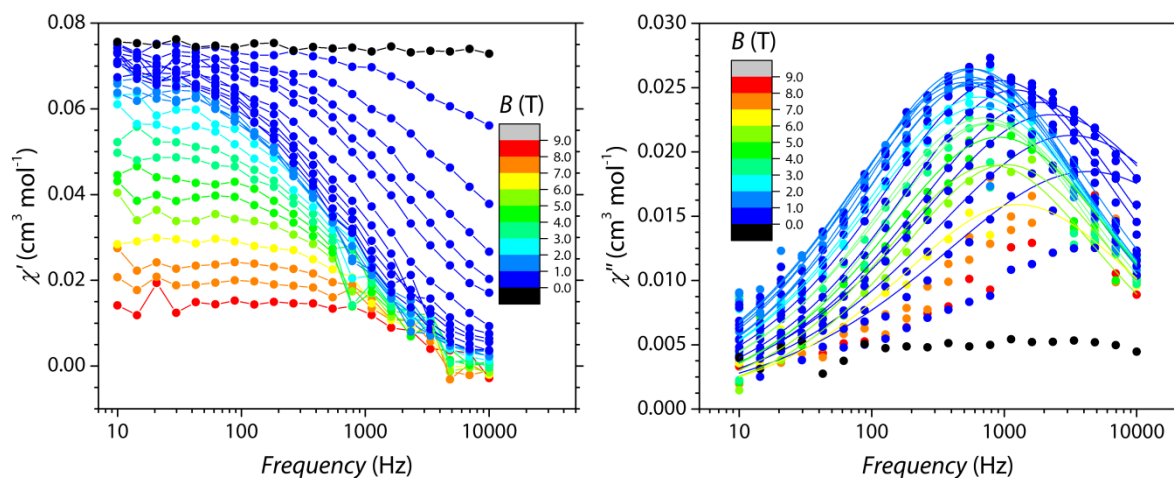

**Figure S9.** Frequency dependence of the real component  $\chi'$  (left) and the imaginary component  $\chi''$  (right) of the magnetic susceptibility of **2** as a function of the magnetic field (0.0–8.8 T range) at  $T = 5$  K.

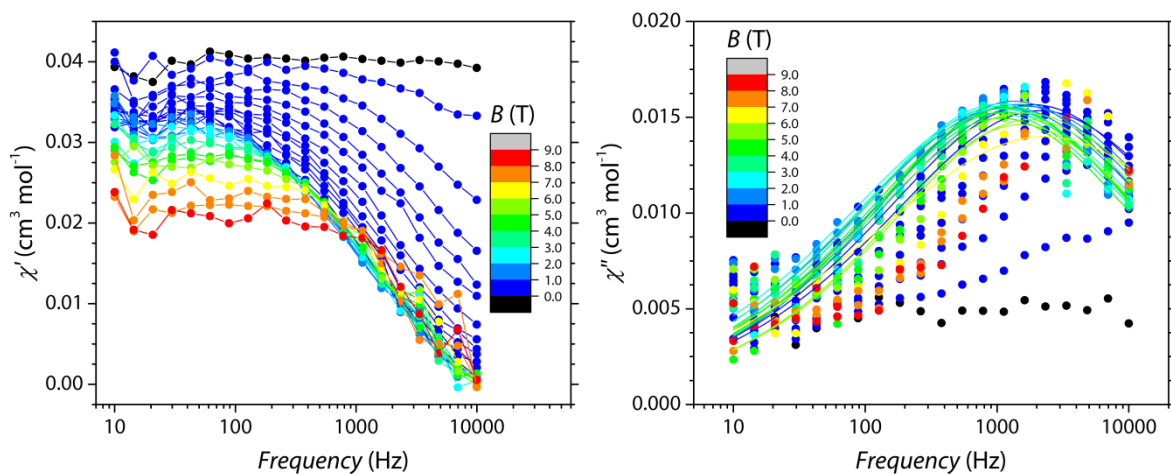

**Figure S10.** Frequency dependence of the real component  $\chi'$  (left) and the imaginary component  $\chi''$  (right) of the magnetic susceptibility of **2** as a function of the magnetic field (0.0–8.8 T range) at  $T = 10$  K.

**Table S1.** Best-fit parameters of the model (Equation 1, main text) used to reproduce the field dependence of the magnetization relaxation rate for **1** and **2** at  $T = 5$  K and 10 K.

| Compound | $T$ (K) | $c$ ( $\text{T}^{-4}\text{ms}^{-1}$ ) | $d$ ( $\text{ms}^{-1}$ ) | $e$ ( $\text{ms}^{-1}$ ) | $f$ ( $\text{ms}^{-1}$ ) |
|----------|---------|---------------------------------------|--------------------------|--------------------------|--------------------------|
| <b>1</b> | 5       | 0.0025(3)                             | 18(1)                    | 0.18(1)                  | 0.71(6)                  |
|          | 10      | 0.0015(3)                             | 45(4)                    | 0.17(1)                  | 0.48(5)                  |
| <b>2</b> | 5       | 0.0032(4)                             | 61(20)                   | 0.06(4)                  | 0.11(2)                  |
|          | 10      | 0.0086(8)                             | 83(6)                    | 0.07(1)                  | 0.16(2)                  |

## CW-EPR Spectroscopy

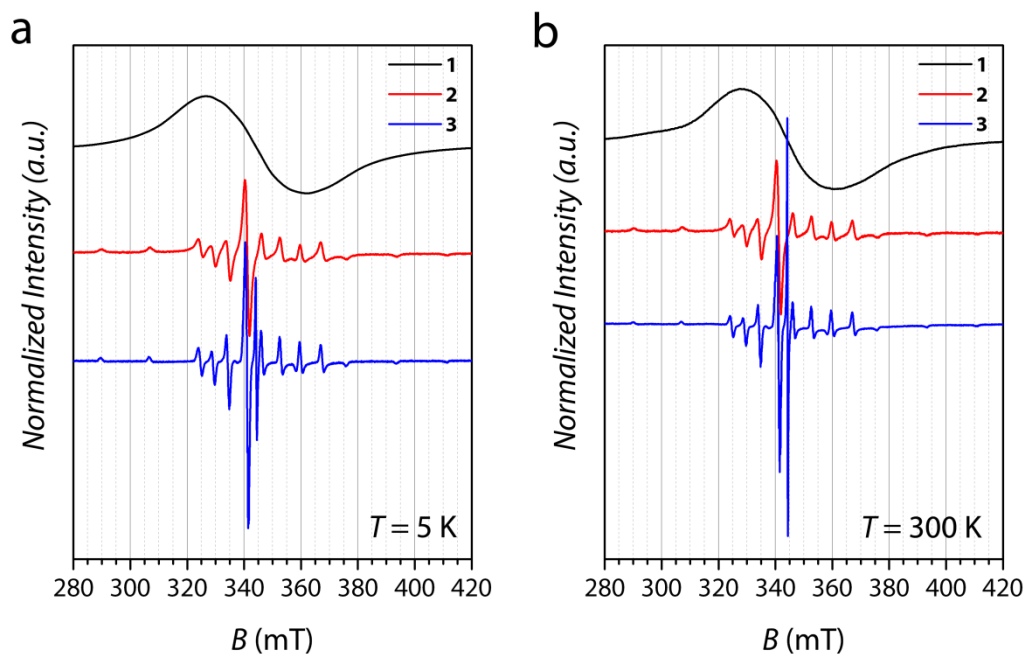

**Figure S11.** Experimental CW-EPR X-band spectra (9.47 GHz) for **1** (black line), **2** (red line) and **3** (blue line) at  $T = 5\text{ K}$  (a) and  $300\text{ K}$  (b).

**Table S2.** Best-fit parameters of the model (Equation 2, main text) used to reproduce the EPR spectra of **2** and **3** at  $T = 300\text{ K}$ .

| Compound | $g_{xy}$ | $g_z$    | $^vA_{x,y} (\text{cm}^{-1})$ | $^vA_z (\text{cm}^{-1})$ | $^NA_{iso} (\text{cm}^{-1})$ |
|----------|----------|----------|------------------------------|--------------------------|------------------------------|
| <b>2</b> | 1.989(1) | 1.967(1) | 0.0057(1)                    | 0.0158(1)                | -                            |
| <b>3</b> | 1.987(1) | 1.966(1) | 0.0056(1)                    | 0.0159(1)                | 0.00025(1)                   |

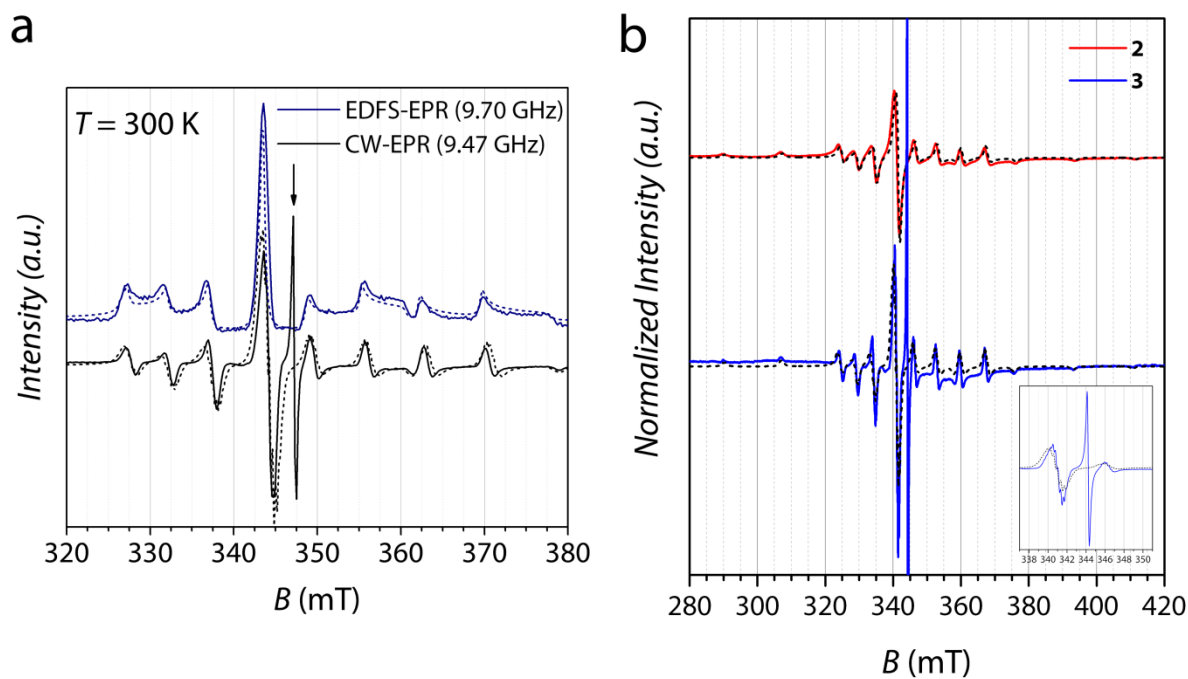

**Figure S12.** (a) Expanded view of the central portion of Figure 3a. (b) Experimental (solid lines) and simulated (black dotted lines) CW-EPR X-band spectra (9.47 GHz) for **2** (red line) and **3** (blue line) at  $T = 300$  K. Inset shows in detail the signals of the so-called powder-like line of VOPc (left) and of the exchange-narrowed signal attributed to  $\text{TiOPc}'^-$  (right).

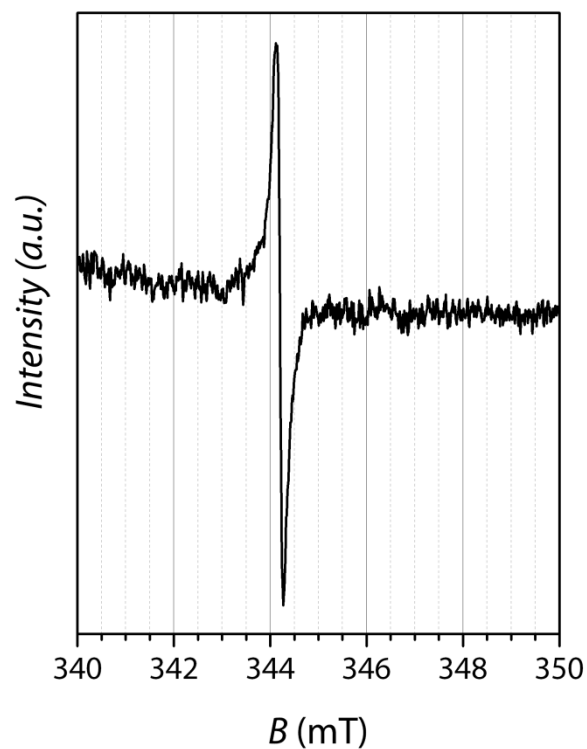

**Figure S13.** Experimental CW-EPR X-band spectra (9.47 GHz) of TiOPc-II as received from Sigma-Aldrich at  $T = 300$  K.



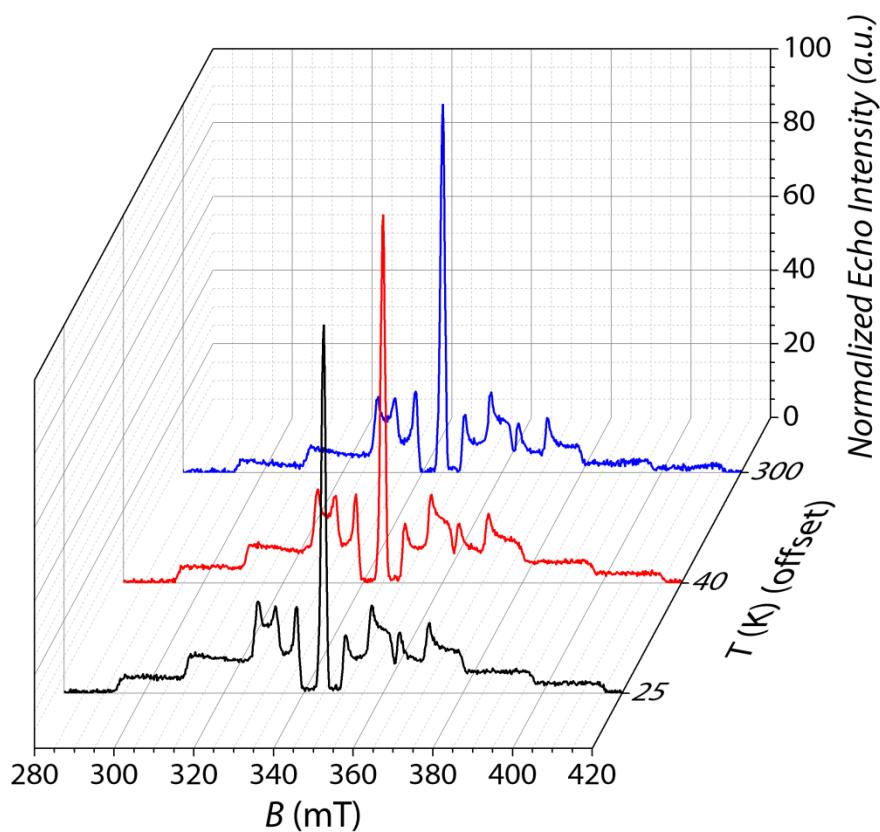

**Figure S14.** Normalized (0–100 a.u.) experimental EDFS-EPR X-band spectra (9.70 GHz) for **3** at different temperatures (offset).

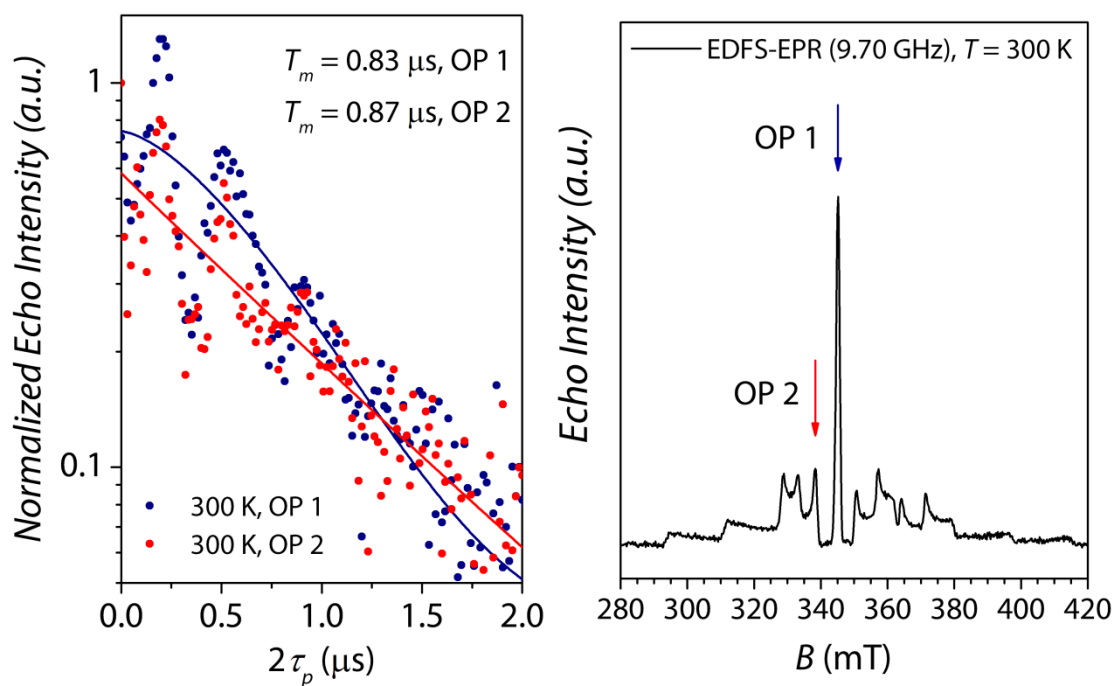

**Figure S15.** Echo decay traces for **3** ( $T = 300$  K) at two different Observer Positions (OP).

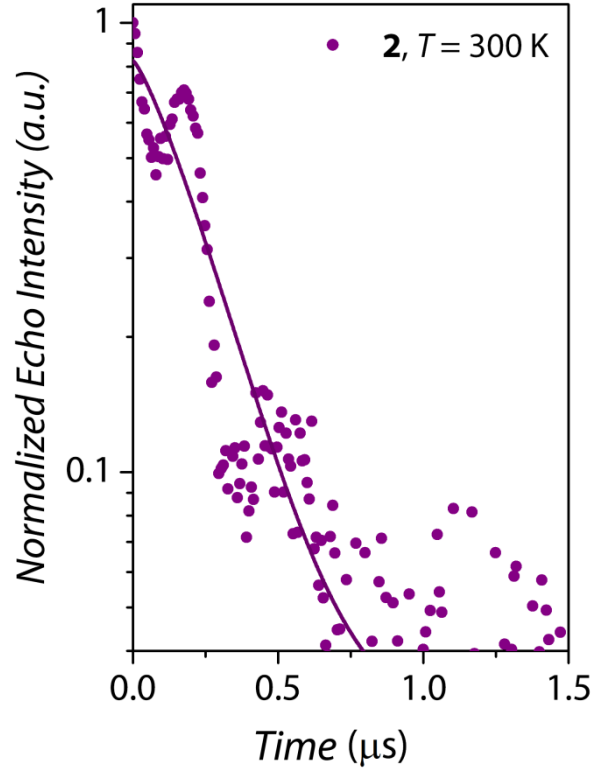

**Figure S16.** Echo decay trace for **2**  $T = 300$  K.

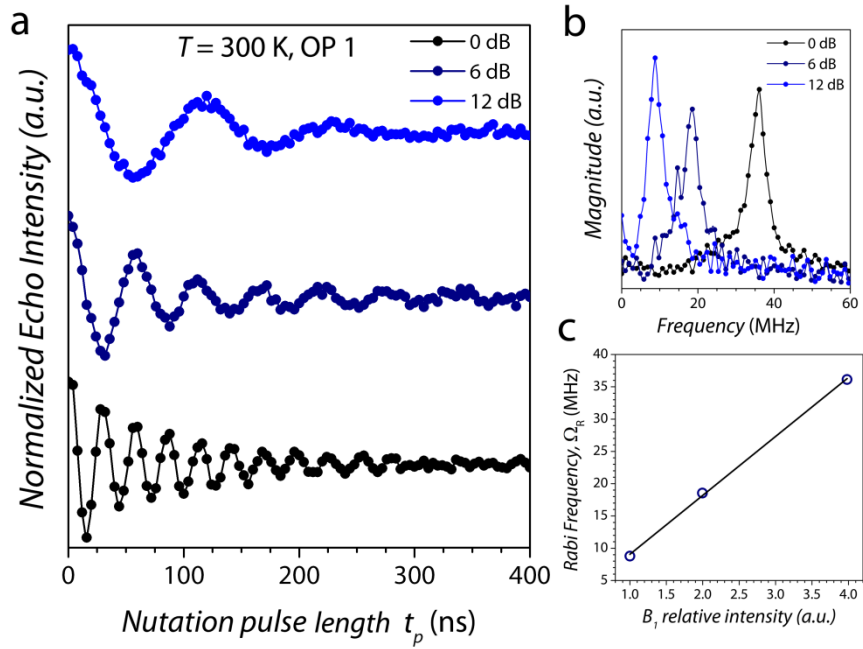

**Figure S17.** (a) Rabi oscillations for **3** recorded at 300 K (OP 1, see Figure S15) for different microwave attenuations. (b) Fourier Transform of the Rabi oscillations. (c) Linear dependence of the Rabi frequency ( $\Omega_R$ ) as a function of the relative intensity of the oscillating field  $B_1$ .

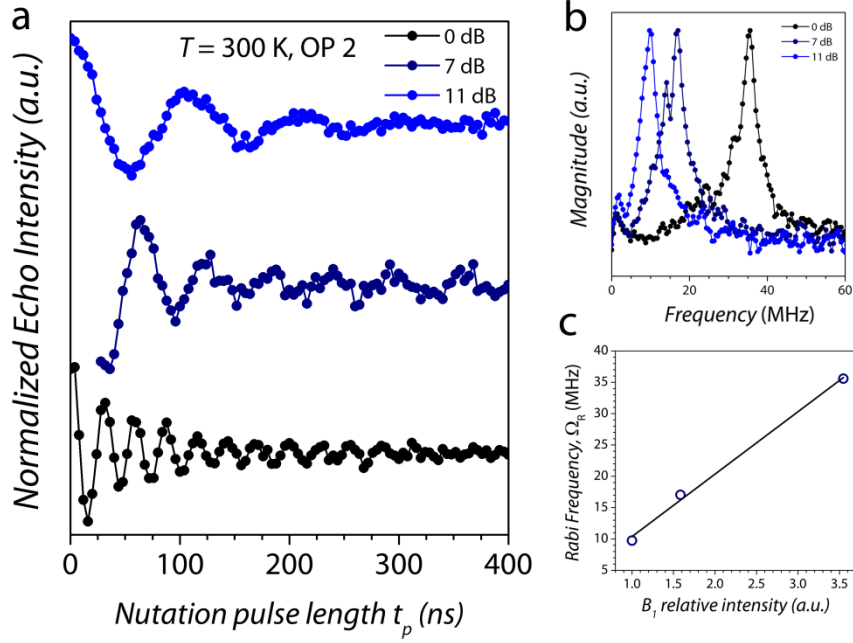

**Figure S18.** (a) Rabi oscillations for **3** recorded at 300 K (OP 2, see Figure S15) for different microwave attenuations. (b) Fourier Transform of the Rabi oscillations. (c) Linear dependence of the Rabi frequency ( $\Omega_R$ ) as a function of the relative intensity of the oscillating field  $B_1$ .

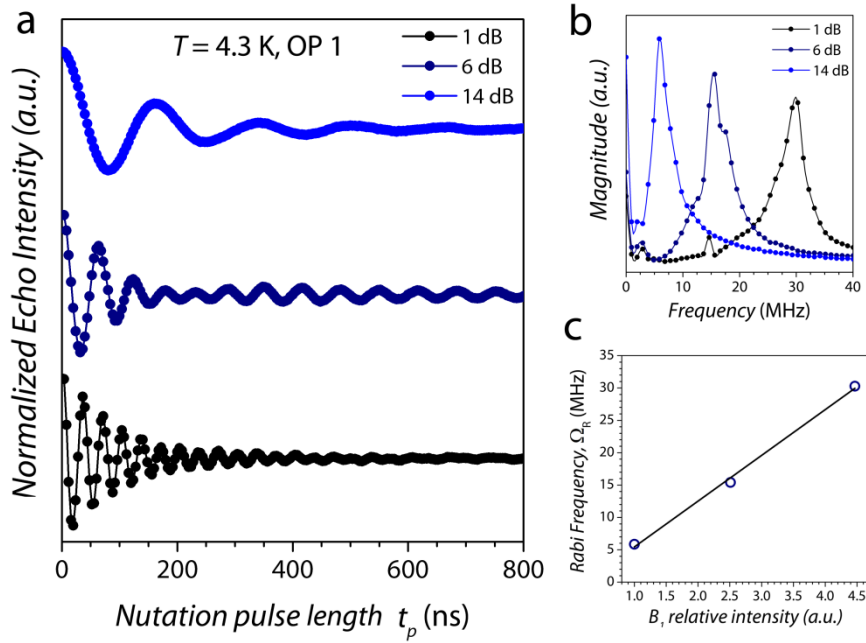

**Figure S19.** (a) Rabi oscillations for **3** recorded at 4.3 K (OP 1, see Figure S15) for different microwave attenuations. (b) Fourier Transform of the Rabi oscillations. (c) Linear dependence of the Rabi frequency ( $\Omega_R$ ) as a function of the relative intensity of the oscillating field  $B_1$ .

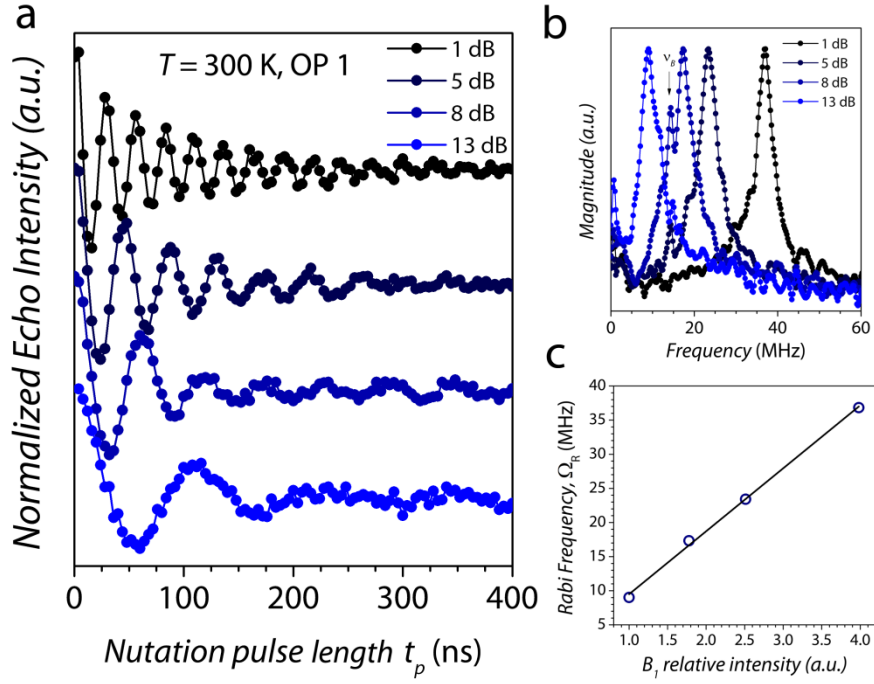

**Figure S20.** (a) Rabi oscillations for **2** recorded at 300 K (OP 1, see Figure S15) for different microwave attenuations. (b) Fourier Transform of the Rabi oscillations. (c) Linear dependence of the Rabi frequency ( $\Omega_R$ ) as a function of the relative intensity of the oscillating field  $B_1$ .

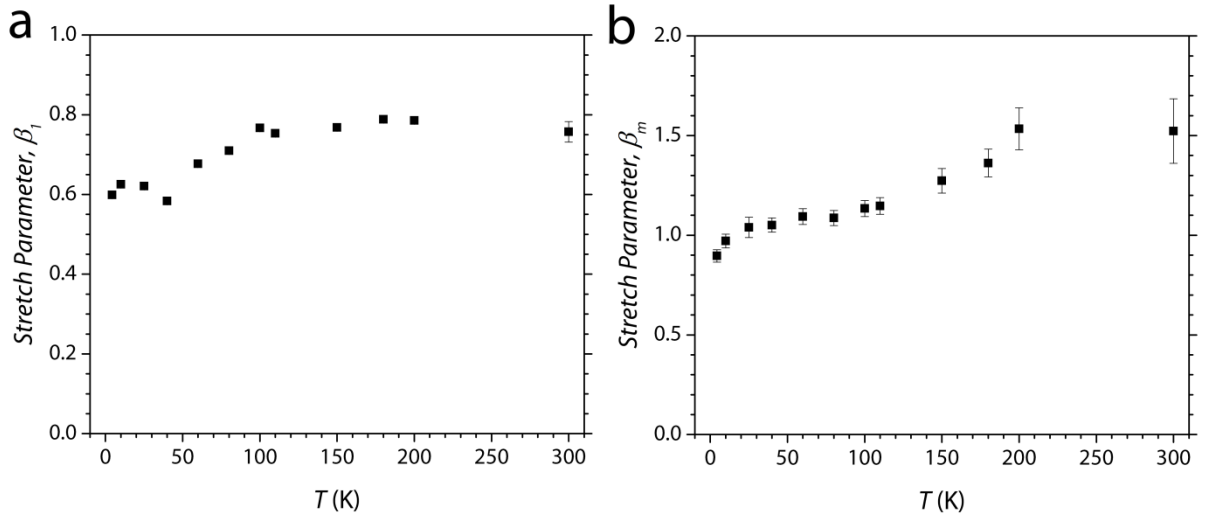

**Figure S21.** Temperature dependence of the best-fit values of the stretching parameters  $\beta_l$  (a) and  $\beta_m$  (b) for **3**.

## Equations

$$I = I_0 + k_1 \exp\left[-\left(\frac{\tau}{T_1}\right)^{\beta_1}\right]$$

**Equation S1.** Stretched-exponential equation used for the fitting of the standard inversion recovery experiments. The temperature dependence of the best-fit values of the stretching parameter  $\beta_1$  is reported in Figure S21a.

$$I = I_0 + k_m \exp\left[-\left(\frac{2\tau}{T_m}\right)^{\beta_m}\right]$$

**Equation S2.** Stretched-exponential equation used for the fitting of the echo decay traces reported in Figure 4a. The temperature dependence of the best-fit values of the stretching parameter  $\beta_m$  is reported in Figure S21b.

$$T_1^{-1} = aT + bT^n$$

**Equation S3.** Equation used for the fitting of the temperature dependence of the  $T_1^{-1}$  relaxation rate as a function of the temperature extracted from pulsed EPR experiments on 3. The best-fit values are  $a = 1.4(2) \times 10^{-5} \mu\text{s K}^{-1}$ ,  $b = 3.8(6) \times 10^{-8} \mu\text{s K}^{-n}$ ,  $n = 3.0(3)$ .

## Experimental Details

**General remarks.** TiOPc and VOPc were purchased from Sigma-Aldrich. The structural phase of TiOPc was declared as Type IV with > 99% purity degree. The structural phase of VOPc was not declared but it was identified by powder X-ray diffraction analysis as Type II by comparison with the simulated pattern generated from atomic coordinates obtained from single crystal X-ray diffraction data.<sup>1</sup>

## Samples Preparation

### Pure compounds

**Diamagnetic Matrix: TiOPc, Type II.** TiOPc, Type IV, (50 mg) was dissolved in 5 mL of a mixture of  $\text{CF}_3\text{COOH}$  (1 mL) and  $\text{CH}_2\text{Cl}_2$  (4 mL). The green solution was stirred at room temperature for 10 minutes then poured into 50 mL of *iso*-propanol under stirring. The blue precipitate of TiOPc-II obtained was kept under stirring for 15 minutes and separated from the solution by centrifugation. The solid washed several times with *iso*-propanol and dried in oven at 80 °C for 2 hours. Yield: Quantitative.

**Paramagnetic Sample: VOPc, Type II (1).** This compound was purified according to the procedure reported above for TiOPc-II, by filtering off the undissolved solid found in the CF<sub>3</sub>COOH:CH<sub>2</sub>Cl<sub>2</sub> green solution before pouring it in the precipitating solvent. Yield: 84%.

### Doped Materials

**VOPc:TiOPc 1:10, Type II, VOPc<sub>1:10</sub>-II (2).** **1** (18 mg,  $3.12 \times 10^{-2}$  mmol) and TiOPc-IV, (180 mg,  $3.12 \times 10^{-1}$  mmol) were dissolved in 20 mL of a mixture of CF<sub>3</sub>COOH (4 mL) and CH<sub>2</sub>Cl<sub>2</sub> (16 mL). The green solution was stirred at room temperature for 10 minutes then poured into 200 mL of *iso*-propanol under stirring. The blue precipitate of VOPc<sub>1:10</sub>-II obtained was kept under stirring for 15 minutes and separated from the solution by centrifugation. The solid washed several times with *iso*-propanol and dried in oven at 80 °C for 2 hours. Yield: Quantitative.

**VOPc:TiOPc, 1:1000, Type II, VOPc<sub>1:1000</sub>-II (3).** This sample was prepared according to the procedure reported above for **2** by dissolving **1** (0.5 mg,  $8.63 \times 10^{-4}$  mmol) and TiOPc-IV, (497 mg,  $8.63 \times 10^{-1}$  mmol) in 55 mL of a mixture of CF<sub>3</sub>COOH (11 mL) and CH<sub>2</sub>Cl<sub>2</sub> (44 mL), and pouring the resulting green solution into 500 mL of *iso*-propanol. Yield: Quantitative.

**Powder X-Ray Crystallography.** Wide-Angle Powder X-Ray Diffraction (PXRD) patterns on polycrystalline samples were recorded on a *Bruker New D8 Advance DAVINCI* diffractometer in a theta-theta configuration equipped with a linear detector. The scans were collected within the range 5–35° (2 $\theta$ ) using CuK $\alpha$  radiation ( $\lambda = 1.540$  Å). The simulated patterns were generated from the atomic coordinates of the single-crystal structure solutions using the Mercury CSD 3.3 program<sup>2</sup> (copyright CCDC, <http://www.ccdc.cam.ac.uk/mercury/>) using a FWHM (full width at half maximum) of 0.60 and a 2 $\theta$  step of 0.02.

**Electron Paramagnetic Resonance.** CW X-Band EPR spectra of all samples were recorded on a *Bruker Eleksys E500* spectrometer equipped with a SHQ cavity ( $\nu = 9.47$  GHz). Low temperature measurements were obtained using an *Oxford Instruments ESR900* continuous flow helium cryostat. The estimation of the relative abundance of the TiOPc<sup>•-</sup> radical signal in TiOPc-II as received from Sigma-Aldrich and in **3** was obtained by double integration of the corresponding 300 K spectra - measured using the same instrumental parameters- of weighted

amount of samples. Pulsed EPR measurements were carried out with a *Bruker Eleksys E580* at X-band ( $\nu \cong 9.70$  GHz) equipped with a flexline dielectric ring ENDOR resonator (*Bruker EN 4118X-MD4*). Temperatures between 4 and 250 K were obtained with an *Oxford Instruments CF935* continuous flow helium cryostat. Typical pulse lengths were 20 ns ( $\pi/2$ ) and 40 ns ( $\pi$ ). For Echo detected field swept EPR spectra, the Hahn Echo pulse sequence ( $\pi/2 - \tau - \pi - \tau - \text{echo}$ ) with fixed interpulse delay time  $\tau = 200$  ns, was applied while sweeping the magnetic field. Phase memory times measurements were obtained by measuring the primary echo decay with varying interpulse delay ( $\tau$ ) starting from  $\tau = 98$  ns at a fixed magnetic field. Spin-lattice-relaxation times were measured using the standard inversion recovery sequence ( $\pi - t_d - \pi/2 - \tau - \pi - \tau - \text{echo}$ ), with  $\pi/2 = 16$  ns. Nutation measurements were performed with a nutation pulse ( $t_p$ ) of variable length followed by a Hahn echo sequence ( $t_p - t_d - \pi/2 - \tau - \pi - \tau - \text{echo}$ ) with  $t_d \gg T_m$  (i.e.  $t_d = 7$   $\mu$ s for 4 K and 2  $\mu$ s for RT measurements). The interpulse delay  $\tau$  was 200 ns and the pulse length of the detection sequence was adjusted depending on the attenuation level of  $B_1$ .

**Magnetic measurements.** Alternate current (AC) susceptibility measurements were performed in the temperature range 1.8–40 K with applied magnetic fields up to 9 T on polycrystalline samples of compounds **1** (27.93 mg) and **2** (100.88 mg), by using a *Quantum Design Physical Property Measurement System (PPMS)* equipped with a AC susceptometer operating in the 10 Hz–10 kHz frequency range. Susceptibility data were corrected for the sample holder previously measured using the same conditions and for the diamagnetic contributions as deduced by using Pascal's constant tables.<sup>3</sup>

## References

1. R. F. Ziolo, C. H. Griffiths and J. M. Troup, *J. Chem. Soc., Dalton Trans.*, **1980**, 2300–2302;
2. C. F. Macrae, P. R. Edgington, P. McCabe, E. Pidcock, G. P. Shields, R. Taylor, M. Towler and J. van de Streek, *J. Appl. Crystallogr.*, **2006**, 39, 453–457;
3. G. A. Bain and J. F. Berry, *J. Chem. Educ.*, **2008**, 85, 532–536.
